# Supplementary material
Source: Springer Nature journal article supplement (https://www.springermedizin.de/resource/supplementary/13223_2012_372_MOESM1_ESM.pdf/9597822)
Supplement: MOESM1 [file 9597822]

Table 1. Genes analyzed by PCR array

| Human Cytokines & Chemokines Array |                | Allergy & Asthma Array |                |
|------------------------------------|----------------|------------------------|----------------|
| Gene                               | NCBI accession | Gene                   | NCBI accession |
| <i>ADIPOQ</i>                      | NM_004797      | <i>ADAM33</i>          | NM_025220      |
| <i>BMP2</i>                        | NM_001200      | <i>ADRB2</i>           | NM_000024      |
| <i>BMP4</i>                        | NM_130851      | <i>ALOX5</i>           | NM_000698      |
| <i>BMP6</i>                        | NM_001718      | <i>AREG</i>            | NM_001657      |
| <i>BMP7</i>                        | NM_001719      | <i>ARG1</i>            | NM_000045      |
| <i>C5</i>                          | NM_001735      | <i>BCL6</i>            | NM_001706      |
| <i>CCL1</i>                        | NM_002981      | <i>CCL11</i>           | NM_002986      |
| <i>CCL11</i>                       | NM_002986      | <i>CCL17</i>           | NM_002987      |
| <i>CCL13</i>                       | NM_005408      | <i>CCL2</i>            | NM_002982      |
| <i>CCL17</i>                       | NM_002987      | <i>CCL22</i>           | NM_002990      |
| <i>CCL18</i>                       | NM_002988      | <i>CCL24</i>           | NM_002991      |
| <i>CCL19</i>                       | NM_006274      | <i>CCL26</i>           | NM_006072      |
| <i>CCL2</i>                        | NM_002982      | <i>CCL5</i>            | NM_002985      |
| <i>CCL20</i>                       | NM_004591      | <i>CCL8</i>            | NM_005623      |
| <i>CCL21</i>                       | NM_002989      | <i>CCR3</i>            | NM_001837      |
| <i>CCL22</i>                       | NM_002990      | <i>CCR4</i>            | NM_005508      |
| <i>CCL24</i>                       | NM_002991      | <i>CCR8</i>            | NM_005201      |
| <i>CCL3</i>                        | NM_002983      | <i>CD40LG</i>          | NM_000074      |
| <i>CCL5</i>                        | NM_002985      | <i>CHI3L1</i>          | NM_001276      |
| <i>CCL7</i>                        | NM_006273      | <i>CHIA</i>            | NM_201653      |
| <i>CCL8</i>                        | NM_005623      | <i>CLC</i>             | NM_001828      |
| <i>CD40LG</i>                      | NM_000074      | <i>CLCA1</i>           | NM_001285      |
| <i>CNTF</i>                        | NM_000614      | <i>CMA1</i>            | NM_001836      |
| <i>CSF1</i>                        | NM_000757      | <i>CPA3</i>            | NM_001870      |
| <i>CSF2</i>                        | NM_000758      | <i>CRLF2</i>           | NM_001012288   |
| <i>CSF3</i>                        | NM_000759      | <i>CSF2</i>            | NM_000758      |
| <i>CX3CL1</i>                      | NM_002996      | <i>CSF3R</i>           | NM_000760      |
| <i>CXCL1</i>                       | NM_001511      | <i>CYSLTR1</i>         | NM_006639      |
| <i>CXCL10</i>                      | NM_001565      | <i>EPX</i>             | NM_000502      |
| <i>CXCL11</i>                      | NM_005409      | <i>FCER1A</i>          | NM_002001      |
| <i>CXCL12</i>                      | NM_000609      | <i>FOXP3</i>           | NM_014009      |
| <i>CXCL13</i>                      | NM_006419      | <i>GATA3</i>           | NM_002051      |
| <i>CXCL16</i>                      | NM_022059      | <i>PTGDR2</i>          | NM_004778      |
| <i>CXCL2</i>                       | NM_002089      | <i>ICOS</i>            | NM_012092      |
| <i>CXCL5</i>                       | NM_002994      | <i>IFNG</i>            | NM_000619      |
| <i>CXCL9</i>                       | NM_002416      | <i>IFNGR2</i>          | NM_005534      |
| <i>FASLG</i>                       | NM_000639      | <i>IL10</i>            | NM_000572      |
| <i>GPI</i>                         | NM_000175      | <i>IL12A</i>           | NM_000882      |

|                  |           |                |              |
|------------------|-----------|----------------|--------------|
| <i>IFNA2</i>     | NM_000605 | <i>IL12B</i>   | NM_002187    |
| <i>IFNG</i>      | NM_000619 | <i>IL13</i>    | NM_002188    |
| <i>IL10</i>      | NM_000572 | <i>IL13RA1</i> | NM_001560    |
| <i>IL11</i>      | NM_000641 | <i>IL13RA2</i> | NM_000640    |
| <i>IL12A</i>     | NM_000882 | <i>IL17A</i>   | NM_002190    |
| <i>IL12B</i>     | NM_002187 | <i>IL17RB</i>  | NM_018725    |
| <i>IL13</i>      | NM_002188 | <i>IL18</i>    | NM_001562    |
| <i>IL15</i>      | NM_000585 | <i>IL1RL1</i>  | NM_016232    |
| <i>IL16</i>      | NM_004513 | <i>IL21</i>    | NM_021803    |
| <i>IL17A</i>     | NM_002190 | <i>IL25</i>    | NM_022789    |
| <i>IL17F</i>     | NM_052872 | <i>IL2RA</i>   | NM_000417    |
| <i>IL18</i>      | NM_001562 | <i>IL3</i>     | NM_000588    |
| <i>IL1A</i>      | NM_000575 | <i>IL31</i>    | NM_001014336 |
| <i>IL1B</i>      | NM_000576 | <i>IL33</i>    | NM_033439    |
| <i>IL1RN</i>     | NM_000577 | <i>IL3RA</i>   | NM_002183    |
| <i>IL2</i>       | NM_000586 | <i>IL4</i>     | NM_000589    |
| <i>IL21</i>      | NM_021803 | <i>IL4R</i>    | NM_000418    |
| <i>IL22</i>      | NM_020525 | <i>IL5</i>     | NM_000879    |
| <i>IL23A</i>     | NM_016584 | <i>IL5RA</i>   | NM_000564    |
| <i>IL24</i>      | NM_006850 | <i>IL9</i>     | NM_000590    |
| <i>IL27</i>      | NM_145659 | <i>KIT</i>     | NM_000222    |
| <i>IL3</i>       | NM_000588 | <i>KITLG</i>   | NM_003994    |
| <i>IL4</i>       | NM_000589 | <i>LTB4R</i>   | NM_181657    |
| <i>IL5</i>       | NM_000879 | <i>MAF</i>     | NM_005360    |
| <i>IL6</i>       | NM_000600 | <i>MMP9</i>    | NM_004994    |
| <i>IL7</i>       | NM_000880 | <i>MRC1</i>    | NM_002438    |
| <i>IL8</i>       | NM_000584 | <i>MS4A2</i>   | NM_000139    |
| <i>IL9</i>       | NM_000590 | <i>PDCD1</i>   | NM_005018    |
| <i>LIF</i>       | NM_002309 | <i>PMCH</i>    | NM_002674    |
| <i>LTA</i>       | NM_000595 | <i>POSTN</i>   | NM_006475    |
| <i>LTB</i>       | NM_002341 | <i>PPARG</i>   | NM_015869    |
| <i>MIF</i>       | NM_002415 | <i>PRG2</i>    | NM_002728    |
| <i>MSTN</i>      | NM_005259 | <i>RETNLB</i>  | NM_032579    |
| <i>NODAL</i>     | NM_018055 | <i>RNASE2</i>  | NM_002934    |
| <i>OSM</i>       | NM_020530 | <i>RNASE3</i>  | NM_002935    |
| <i>PPBP</i>      | NM_002704 | <i>RORC</i>    | NM_005060    |
| <i>SPP1</i>      | NM_000582 | <i>SATB1</i>   | NM_002971    |
| <i>TGFB2</i>     | NM_003238 | <i>SIGLEC8</i> | NM_014442    |
| <i>THPO</i>      | NM_000460 | <i>STAT5A</i>  | NM_003152    |
| <i>TNF</i>       | NM_000594 | <i>STAT6</i>   | NM_003153    |
| <i>TNFRSF11B</i> | NM_002546 | <i>TBX21</i>   | NM_013351    |

|                 |           |                |           |
|-----------------|-----------|----------------|-----------|
| <i>TNFSF10</i>  | NM_003810 | <i>TGFB1</i>   | NM_000660 |
| <i>TNFSF11</i>  | NM_003701 | <i>TNFRSF4</i> | NM_003327 |
| <i>TNFSF13B</i> | NM_006573 | <i>TNFSF4</i>  | NM_003326 |
| <i>VEGFA</i>    | NM_003376 | <i>TPSAB1</i>  | NM_003294 |
| <i>XCL1</i>     | NM_002995 | <i>TSLP</i>    | NM_033035 |
